# Supplementary material for: Hypermethioninemia Leads to Fatal Bleeding and Increased Mortality in a Transgenic I278T Mouse Model of Homocystinuria
Source: PubMed Central journal article supplement (PMC7459533; doi:10.3390/biomedicines8080244), 2020-07-24
Supplement: biomedicines-08-00244-s001.pdf [file biomedicines-08-00244-s001.pdf]

**Supplementary Table S1. Amino acid-defined diets used in the study.**

| <b>Component (g/kg)</b>                                         | <b>MRD<br/>(TD.110591)</b> | <b>REG<br/>(TD.170063)</b> | <b>HMD<br/>(TD.01084)</b> |
|-----------------------------------------------------------------|----------------------------|----------------------------|---------------------------|
| L-Alanine                                                       | 3.5                        | 3.5                        | 3.5                       |
| L-Arginine.HCl                                                  | 12.1                       | 12.1                       | 12.1                      |
| L-Asparagine                                                    | 6.0                        | 6.0                        | 6.0                       |
| L-Aspartic Acid                                                 | 3.5                        | 3.5                        | 3.5                       |
| L-Cystine                                                       | 3.5                        | 3.5                        | 3.5                       |
| L-Glutamic Acid                                                 | 40.0                       | 36.5                       | 40.0                      |
| Glycine                                                         | 23.04                      | 23.04                      | 23.3                      |
| L-Histidine.HCl, monohydrate                                    | 4.5                        | 4.5                        | 4.5                       |
| L-Isoleucine                                                    | 8.2                        | 8.2                        | 8.2                       |
| L-Leucine                                                       | 11.1                       | 11.1                       | 11.1                      |
| L-Lysine.HCl                                                    | 18.0                       | 18.0                       | 18.0                      |
| L-Methionine                                                    | 0.5                        | 4.0                        | 8.2                       |
| L-Phynylalanine                                                 | 7.5                        | 7.5                        | 7.5                       |
| L-Proline                                                       | 3.5                        | 3.5                        | 3.5                       |
| L-Serine                                                        | 3.5                        | 3.5                        | 3.5                       |
| L-Threonine                                                     | 8.2                        | 8.2                        | 8.2                       |
| L-Tryptophan                                                    | 1.8                        | 1.8                        | 1.8                       |
| L-Tyrosine                                                      | 5.0                        | 5.0                        | 5.0                       |
| L-Valine                                                        | 8.2                        | 8.2                        | 8.2                       |
| Sucrose                                                         | 353.14                     | 353.14                     | 344.98                    |
| Corn Starch                                                     | 150.0                      | 150.0                      | 150.0                     |
| Maltodextrin                                                    | 150.0                      | 150.0                      | 150.0                     |
| Soybean Oil                                                     | 80.0                       | 80.0                       | 80.0                      |
| Cellulose                                                       | 30.0                       | 30.0                       | 30.0                      |
| Mineral Mix (AIN-93M-MX)                                        | 35.0                       | 35.0                       | 35.0                      |
| Calcium Phosphate, monobasic, monohydrate                       | 8.2                        | 8.2                        | 8.2                       |
| Vitamin Mix (AIN-93-VX)                                         | 19.5                       | 19.5                       | 19.5                      |
| Choline bitartrate                                              | 2.5                        | 2.5                        | 2.7                       |
| TBHQ (antioxidant)                                              | 0.02                       | 0.02                       | 0.02                      |
| <b>Summary nutrient information (% by weight / % kcal from)</b> |                            |                            |                           |
| Proteins                                                        | 16.5 / 16.4                | 14.9 / 15.1                | 17.3 / 17.2               |
| Carbohydrates                                                   | 65.7 / 65.6                | 65.7 / 66.7                | 64.9 / 64.8               |
| Fat                                                             | 8.0 / 18.0                 | 8.0 / 18.3                 | 8.0 / 18.0                |
| Energy density (Kcal/g)                                         | 4.0                        | 3.9                        | 4.0                       |
